# Supplementary material for: Triggering photocatalytic activity of carbon dot-based nanocomposites by a self-supplying peroxide
Source: Royal Society of Chemistry journal article supplement (doi:10.1039/d1ta01097b), 2021-01-01
Supplement: d1ta01097b1.pdf [file d1ta01097b1.pdf]

## *Supporting Information*

### **Triggering photocatalytic activity of carbon dot-based nanocomposites by self-supplying peroxide**

Tingting Cai,<sup>a,b</sup> Qing Chang,<sup>a</sup> Bin Liu,<sup>a</sup> Caihong Hao<sup>a</sup>, Jinlong Yang,<sup>a,c</sup>  
and Shengliang Hu\*<sup>a</sup>

<sup>a</sup> Research Group of New Energy Materials and Devices, North  
University of China, Taiyuan 030051, P. R. China.

<sup>b</sup> Department of Chemistry and Chemical Engineering, Luliang  
University, Lvliang 033000, P.R. China

<sup>c</sup> State Key Laboratory of New Ceramics and Fine Processing, Tsinghua  
University, Beijing 100084, P. R. China.

# 1. Experimental Procedures

## 1.1 Materials and reagents

The anthracite was purchased from Yangquan Coal Industry in Shanxi province, China, and the powder used for the CDs preparation was obtained through the ball-milling. Other chemicals including copper (II) chloride dihydrate ( $\text{CuCl}_2 \cdot 2\text{H}_2\text{O}$ ), 3,3',5,5'-Tetramethylbenzidine (TMB), o-Phenylenediamine (OPD),  $\text{H}_2\text{O}_2$  (30 wt%), cupric nitrate ( $\text{Cu}(\text{NO}_3)_2 \cdot 3\text{H}_2\text{O}$ ), acetic acid ( $\text{CH}_3\text{COOH}$ ), sodium acetate ( $\text{CH}_3\text{COONa}$ ), ethylenediaminetetraacetic acid disodium salt (EDTA-2Na), vitamin C (VC), terephthalic acid (TA), nitro blue tetrazorium (NBT), isopropanol (IPA), sodium sulphate ( $\text{Na}_2\text{SO}_4$ ), ethanol absolute, were purchased from Aladdin, and they were directly used without further purification.  $1 \text{ g} \cdot \text{L}^{-1}$  standard  $\text{Cu}^{2+}$  solution was purchased from Guobiao (Beijing) Testing & Certification Co., Ltd, China. All aqueous solutions in the experiment were prepared using ultrapure water.

## 1.2 Preparation of CDs

The preparation strategy of CDs was as mentioned in our previous work<sup>1</sup>. 200 mg anthracite powder was mixed with 30 mL  $\text{H}_2\text{O}_2$  (30wt.%) in the beaker and stirred for 24 h at 80 °C. Then the precipitate was separated with the supernatant through the centrifugation of 10000 rpm, and the supernatant was filtrated with the 0.22  $\mu\text{m}$  filter paper and dialysis in water for 2 days. After vacuum drying at 60 °C for 3 h, the dark brown CDs powder of was collected.

## 1.3 Preparation of CDs@ $\text{CuO}_x$ and $\text{CuO}_x$

Just as the procedure mentioned above, the prepared CDs/ $\text{H}_2\text{O}_2$  solution was reserved after the microfiltration with the 0.22  $\mu\text{m}$  filter paper. Then 1.2 mmol of  $\text{CuCl}_2 \cdot 2\text{H}_2\text{O}$  was slowly added into 30mL CDs/ $\text{H}_2\text{O}_2$  solution and stirred for 15 h at room temperature. Since  $\text{Cu}^{2+}$  can catalyze  $\text{H}_2\text{O}_2$  to generate  $\text{O}_2$  with intense heat

release, so a small amount was added each time to avoid the explosive boiling. Then 2.4 mmol NaOH was dissolved in 5 mL water and dropped into the liquid and reacted for 30 min. After centrifugation, washing and drying, the dark atrovirens powder was collected and we labelled it with CDs@CuO<sub>x</sub>. In the contrast experiment, different addition amount of CuCl<sub>2</sub>·2H<sub>2</sub>O(0.4 mmol, 0.8 mmol, 1.2 mmol, 1.6 mmol, 2.0 mmol) and NaOH (0.8 mmol, 1.6 mmol, 2.4 mmol, 3.2 mmol, 4.0 mmol) was added to adjust the pH of the solution to higher than 8 to facilitate the formation of the oxide of copper. It turned out that the sample with the 1.2 mmol CuCl<sub>2</sub> exhibited the best photocatalytic effect to TMB (Figure S11b). For comparison, with the same preparation process mentioned above, just CDs/H<sub>2</sub>O<sub>2</sub> solution was changed to H<sub>2</sub>O<sub>2</sub> solution alone, the dark brown powder was prepared and marked as CuO<sub>x</sub>.

#### **1.4 Preparation of the pure CuO**

The procedure referred to the previous report<sup>2</sup>, thus 20 mL 0.8 M NaOH was dropped into the 20 mL 0.2 M Cu(NO<sub>3</sub>)<sub>2</sub>·3H<sub>2</sub>O, the solution with the blue precipitate was transferred into a Teflon-lined reactor and heated from room to 180 °C and kept for 2 h. After cooling to room temperature, the bottom of Teflon lining would have precipitates. The collected precipitates were centrifuged and washed three times with water, and dried in a vacuum oven at 60 °C for 4 h.

#### **1.5 Photocatalysis process of TMB and OPD**

30 mM TMB solution was prepared in the ethanol absolute while 0.1 M pH=4 buffer solution was prepared with CH<sub>3</sub>COOH and CH<sub>3</sub>COONa. 1 mg sample was added into the mixture of 10mL buffer solution and 200 μL 30 mM TMB. The solution was irradiated with the light intensity 200 mW/cm<sup>2</sup>. The product TMB-ox shows a characteristic absorption at 652 nm, which was monitored using UV-vis spectrophotometry by taking aliquots at regular intervals.

10 mM OPD solution was prepared and 10 mL was measured to conduct the photocatalysis experiment with 1 mg samples on the irradiation of simulated sunlight (100 mW/cm<sup>2</sup>) with the Tris-HCl buffer. The characteristic absorption peak of OPD-ox was at 417 nm and the measurement was conducted with the UV-vis spectrophotometry.

The visible light irradiation was provided using a solar light simulator (CEL-HXUV300, CEAULIGHT, China) with optical cut-off filters that were utilized to remove wavelengths below 420 nm. The wavelength intensity distribution curve of the visible light spectrum is shown in Figure S4.

### 1.6 Recycle of CDs@CuO<sub>x</sub>

The recycle of CDs@CuO<sub>x</sub> in OPD system was simple, thus collecting and drying the sediment after centrifugation and washing from the OPD-ox solution that after reaction. While since the composite can partly dissolve in the TMB solution with the acid condition of pH=4.0, so the recycle process was a little complex. The pH condition should be adjusted to be >8.0 with the addition of 0.1M NaOH, 10μL of H<sub>2</sub>O<sub>2</sub> were also added to facilitate the formation of CDs@CuO<sub>x</sub>. Then the precipitate was washed for three times and dried in the vacuum oven.

### 1.7 Experiment of reaction dynamics

The reaction dynamics was then studied in a series of TMB solutions with a range of concentration. The absorbance displayed a linear increase in each concentration (Figure S8) and the value of the slop rised gradually. The absorbance data should be converted to TMB-ox concentration according to the Lambert beer's law (1) when calculate the velocity.

$$A = \varepsilon \times b \times C \quad (1)$$

where  $A$  is absorbance which can be measured;  $\varepsilon$  is the molar extinction coefficient of TMB-ox, ( $\varepsilon=39000 \text{ M}^{-1}\text{cm}^{-1}$ );  $b$  is the path length of light ( $b=1 \text{ cm}$ ).

Then the reaction rates were fitted by Michaelis-Menten equation:

$$v=V_{\max} \times \frac{[S]}{[S] + K_m} \quad (2)$$

where  $V_{\max}$  is the maximal reaction velocity;  $K_m$  is the Michaelis constant;  $[S]$  is the concentration of reaction substrate.

Therein,  $K_m$  is a key parameter that indicates the enzyme affinity for a substrate. The lower  $K_m$  value means the higher affinity of catalysts to the substrates.  $V_{\max}$  refers to the reaction rate when the substrate concentration is saturated.

### 1.8 Sample characterization

TEM and HRTEM were performed on a FEI Tecnai G2 F20 microscope with a field-emission gun operating at 200 kV. X-ray diffraction (XRD) patterns of different samples were obtained on a Bruker D8 ADVANCE powder diffractometer at Cu  $K\alpha$  with a scanning rate of  $2^\circ \text{ min}^{-1}$  in the  $2\theta$  range of  $10\text{--}90^\circ$ . Light absorption spectra were collected on a Shimadzu UV-2550 UV-vis spectrometer. Fluorescence spectra were recorded with a Hitachi F4500 fluorescence spectrophotometer. Fourier transform infrared (FT-IR) spectrum of samples were recorded as KBr pellets with a Bruker Vertex 70 spectrometer from  $4000$  to  $500 \text{ cm}^{-1}$ . X-ray photoelectron spectroscopy(XPS) was tested on the Thermo Scientific ESCALAB 250Xi electron spectrometer with an Al  $K\alpha$  Xray source for determining the composition and chemical bonding configurations. The atomic absorption spectroscopy (AAS, analytischejena ContrAA 800D(Germany)) was used to measure the content of  $\text{Cu}^{2+}$  in the solution.

### 1.9 Electrochemical measurement

The electrochemical measurement was conducted in the solution system of  $0.1 \text{ M Na}_2\text{SO}_4$  with the three electrodes unit. The work electrode, counter electrode, and reference electrode were the sample-coated ITO glass, the Ag/AgCl standard

electrode and the Pt plate, respectively. The electrochemical data was tested and recorded by the SP-200 Bio-logic electrochemical workstation.

Mott-Schottky (MS) curves was measured in the Na<sub>2</sub>SO<sub>4</sub> solution and four frequencies was chosen simultaneously to obtain the flat band potential of CDs@CuO<sub>x</sub> and CuO<sub>x</sub> (Figure S12). Their plots show a negative slope, which is typical for n-type semiconductor<sup>4</sup>. According to the relation of conduction band potential( $E_c$ ) and the flat band potential( $E_{fb}$ )<sup>5, 6</sup>:

$$E_c = E_{fb} - kT \ln \frac{N_D}{N_C} \quad (3)$$

Therein,  $k$  presents the Boltzmann constant,  $T$  stands for the temperature.  $N_D$  and  $N_C$  refer to the donor impurity concentration and the effective conduction band state density. The second term depends mainly on the doping concentration of the semiconductor, and to the heavily-doped n-type semiconductor, it approaches to 0 that can be neglected. Therefore, the equation can be written as  $E_c \approx E_{fb}$ , so the conduction band of CDs@CuO<sub>x</sub> and CuO<sub>x</sub> were respectively -0.18 and 0.38 V (vs. NHE). Meanwhile, the carrier concentration ( $N_d$ ) can be calculated to be  $N_{d-composite}=6.0 \times 10^{20} \text{ cm}^{-3}$  and  $N_{d-CuO}=4.59 \times 10^{20} \text{ cm}^{-3}$  on the basis of the following equation<sup>7</sup>:

$$N_d = \frac{2}{e_0 \epsilon \epsilon_0} \left| \frac{dC^{-2}}{dV} \right|^{-1} \quad (4)$$

in which  $e_0$  refers to the electron charge,  $\epsilon$  and  $\epsilon_0$  is the dielectric constant and vacuum permittivity, respectively.

### 1.10 Detection of free radicals

Hydroxyl radical test. Since terephthalic acid (TA) can react with  $\cdot\text{OH}$  and the production 2-hydroxy terephthalic acid (TAOH) possess unique fluorescence at around 426 nm with excitation of 312 nm,<sup>8</sup> we adopted this method to detect the presence of  $\cdot\text{OH}$ . 0.02 g NaOH was dissolved in 50 mL DI water, and 0.024 g TA was then put into the solution to stir for about 2 hours to ensure the completely dissolution.

Then 10 mg CDs@CuO<sub>x</sub> or CuO<sub>x</sub> was added into the prepared solution to stir for a certain time, then a small amount of the solution was centrifuged, and supernatant fluid was taken to test the fluorescence.

Superoxide radical test. NBT can be reduced by the ·O<sub>2</sub><sup>-</sup> radical to generate blue formazan<sup>9</sup> and the characteristic absorption peak of nitro blue tetrazorium (NBT) at around 260 nm can be detected with the UV-visible spectrophotometer. 1mg NBT was dissolved in 100 mL DI water with magnetic stirring for 30 min to dissolve completely. Then 10mg of CDs@CuO<sub>x</sub> powder was added into 30 mL of the prepared NBT solution. After 10min with irradiation under visible light, 3 mL of the solution was extracted with a syringe (without a needle) and the liquid was filter through a matched 0.22 μm filter membrane to obtain the clear liquid for the test. By contrast, the test without the light was also conducted.

### **1.11 Measurement of the concentration of dissolved Cu<sup>2+</sup>**

We chose atomic absorption spectroscopy (AAS, analyticjena ContrAA 800D (Germany)) to measure the content of Cu<sup>2+</sup> in the solution. The wavelength λ=324.754 nm was chosen as the characteristic wavelength.

Preparation of the AAS samples. 10mg CDs@CuO<sub>x</sub> sample was added into the 50 mL NaAc-HAc buffer (pH =4.0), after stirring with the magnetic stirrer for 5 min, more than 5 mL solution was extracted with a syringe to filter by the 0.22 μm microfiltration membrane. Then 5 mL of the clear liquid was put into the 100 mL volumetric flask to dilute and the solution obtained was marked as Cu<sup>2+</sup>-5 min. Similarly, the dissolve time of 10 and 15 min were also prepared as the steps mentioned above and marked with Cu<sup>2+</sup>-10, Cu<sup>2+</sup>-15 min, respectively. The standard Cu<sup>2+</sup> solution with the concentration of 1, 2, 3, 4 mg·L<sup>-1</sup> was prepared by attenuation from the 1 g·L<sup>-1</sup> standard Cu<sup>2+</sup> solution.

## 2 Supporting Figures

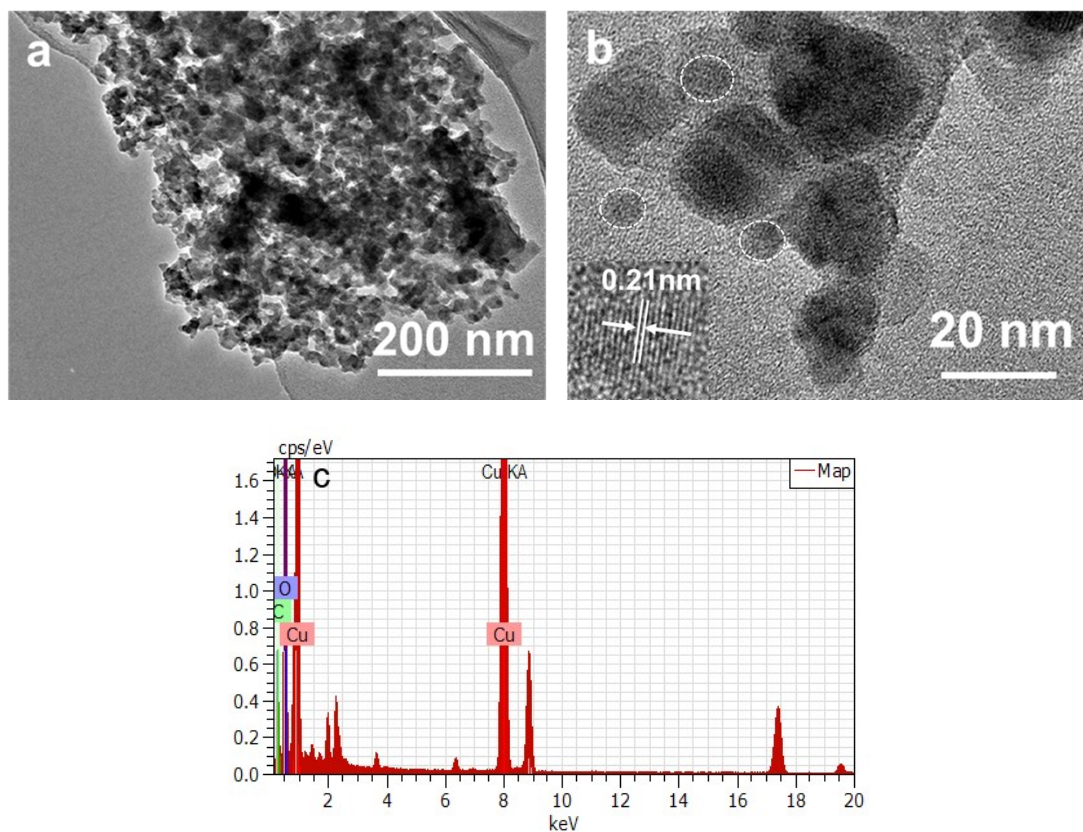

**Figure S1.** The TEM images of CDs@CuO<sub>x</sub> with different scales (a) 200 nm, (b) 20 nm (CDs are marked with white circles and the inset shows the interplanar spacing of one carbon dot). (c) Elements concentration result of CDs@CuO<sub>x</sub> in the STEM elemental mapping.



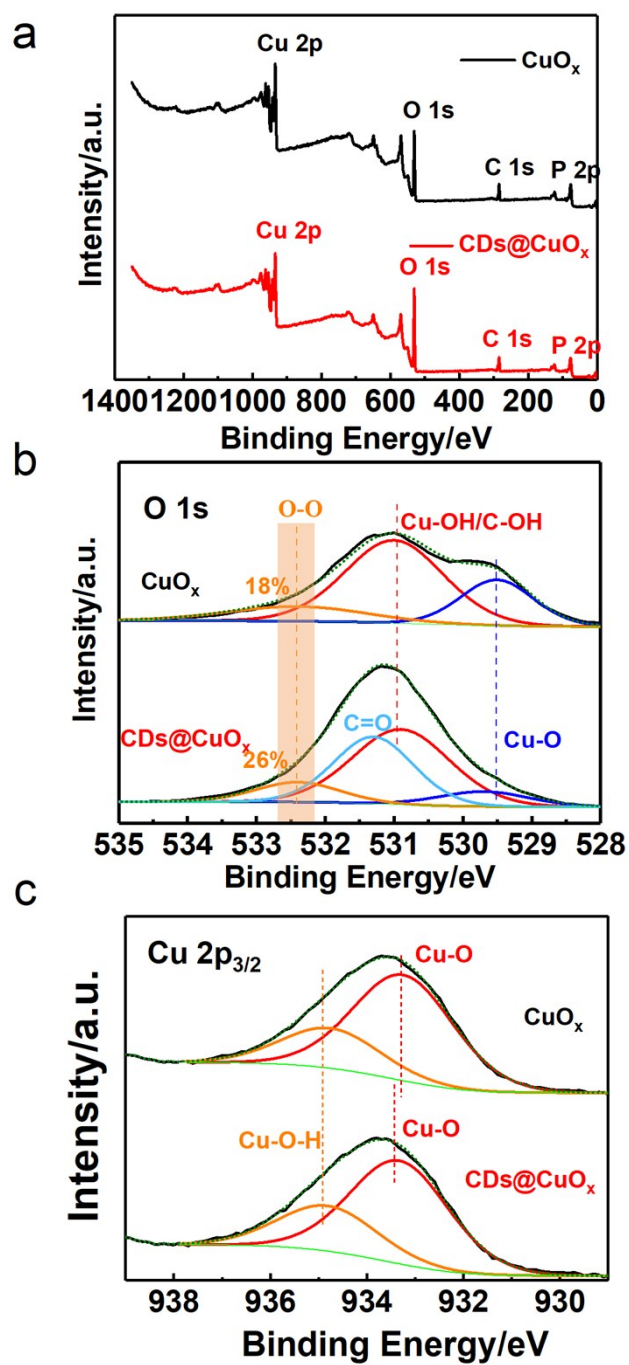

**Figure S2.** XPS analysis of CDs@CuO<sub>x</sub> and CuO<sub>x</sub>. (a) The survey patterns, (b) The high-resolution of O 1s spectra, (c) The high-resolution XPS Cu 2p<sub>3/2</sub> spectra.

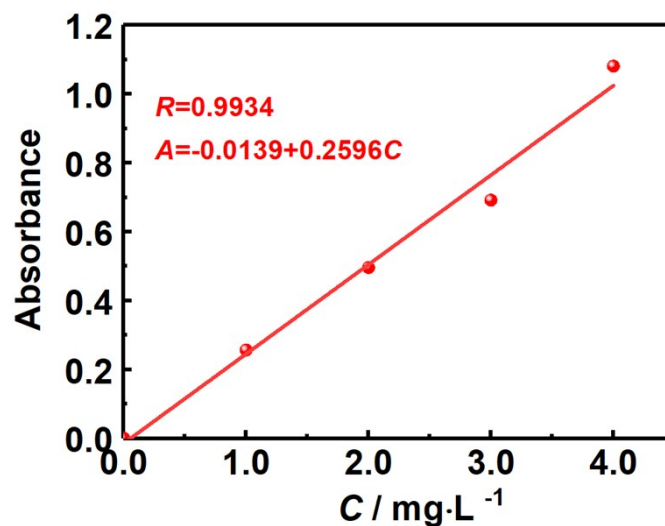

**Figure S3.** The standard  $\text{Cu}^{2+}$  curve obtained by the standard  $\text{Cu}^{2+}$  solution with a series of concentration.

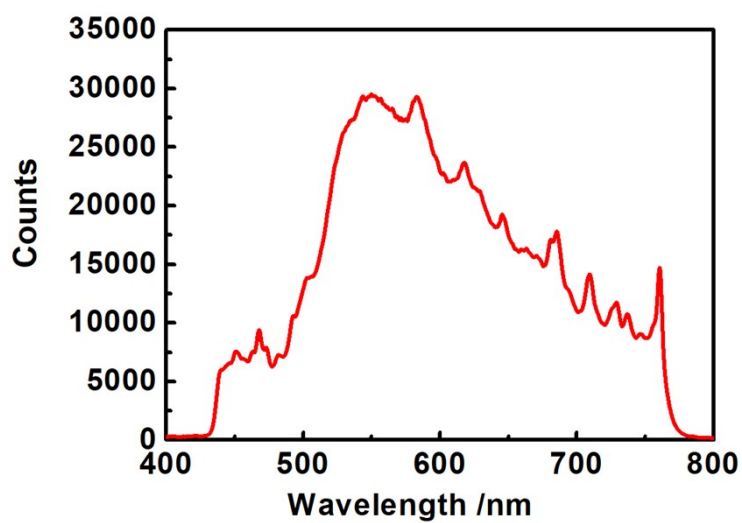

**Figure S4.** The spectrum of the solar light simulator with 420 nm cut-off filter.

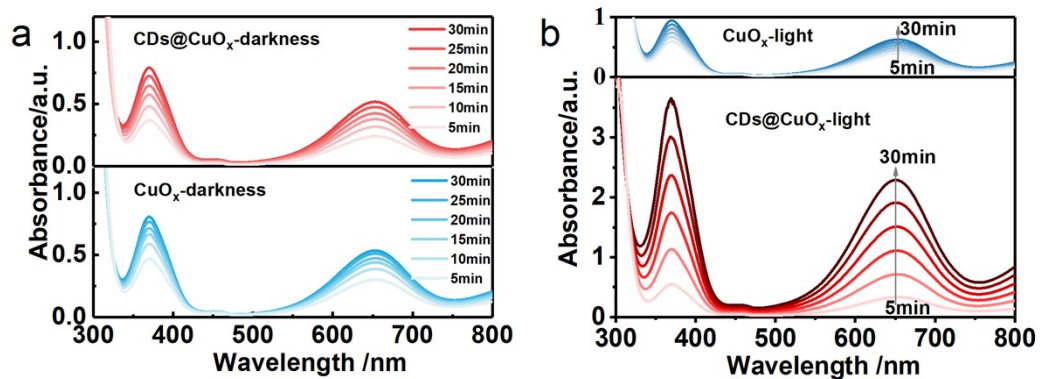

**Figure S5.** The catalytic effect of samples to TMB in different conditions. (a) The result of CDs@CuO<sub>x</sub> and CuO<sub>x</sub> in the darkness. (b) The result of CDs@CuO<sub>x</sub> and CuO<sub>x</sub> with light.

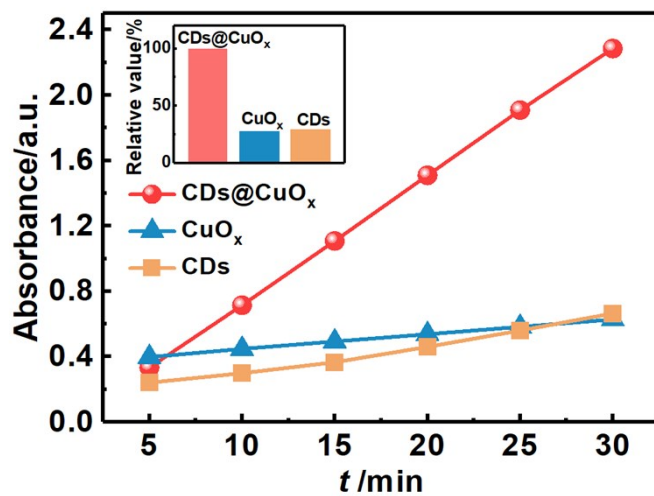

**Figure S6.** The photocatalysis performance comparison of CDs@CuO<sub>x</sub>, CuO<sub>x</sub> and CDs.

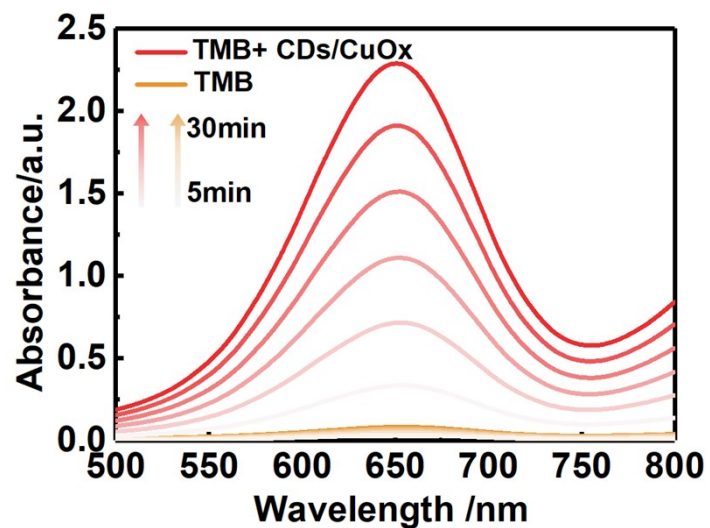

**Figure S7.** The comparison of the oxidation activity of TMB with and without CDs/CuO<sub>x</sub>.

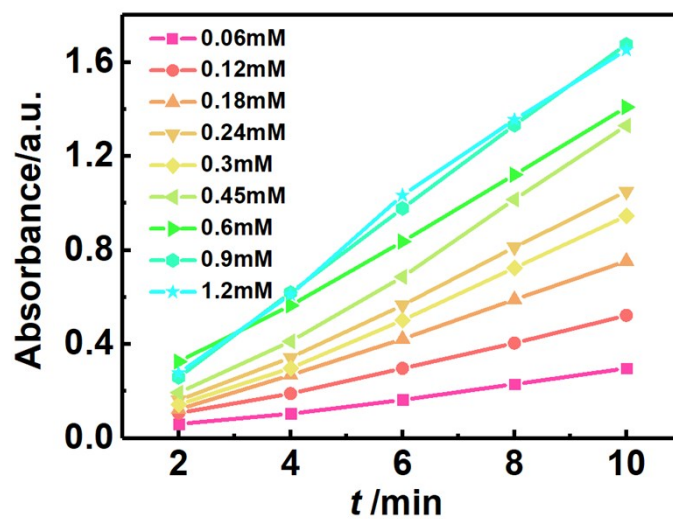

**Figure S8.** The absorbance of the solution with CDs@CuO<sub>x</sub> in different TMB concentration.

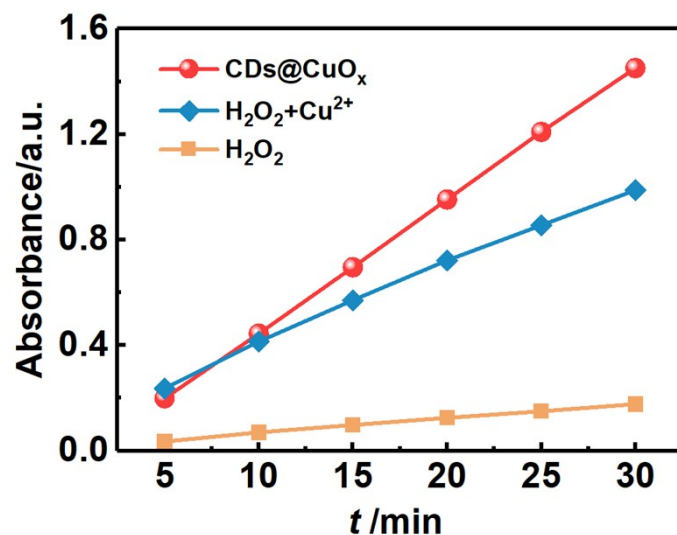

**Figure S9.** The comparison of the Fenton-like system Cu<sup>2+</sup> (CuCl<sub>2</sub>·2H<sub>2</sub>O 1 mg) /H<sub>2</sub>O<sub>2</sub> (10 μL) with CDs@CuO<sub>x</sub> (1 mg), H<sub>2</sub>O<sub>2</sub> (10 μL) was as the blank control group.

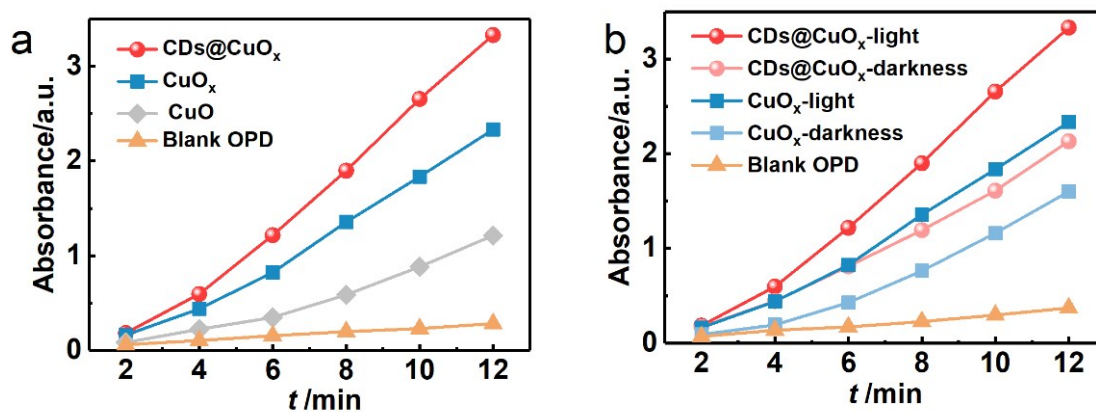

**Figure S10.** (a) The comparison of CDs@CuO<sub>x</sub>, CuO<sub>x</sub> and pure CuO on photocatalysis of OPD. (b) The photocatalytic performance of CDs@CuO<sub>x</sub> and CuO<sub>x</sub> with or without light.

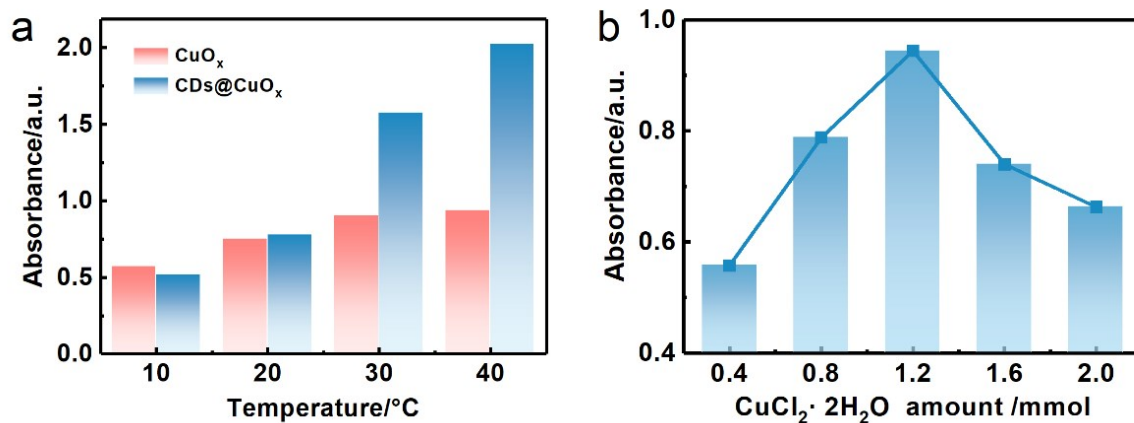

**Figure S11.** (a) The influence of temperature on the photocatalytic effect of CDs@CuO<sub>x</sub> and CuO<sub>x</sub> (b) The photocatalysis performance of the samples of CDs@CuO<sub>x</sub> with different addition amount of CuCl<sub>2</sub>·2H<sub>2</sub>O (0.4 mmol, 0.8 mmol, 1.2 mmol, 1.6 mmol, 2.0 mmol)

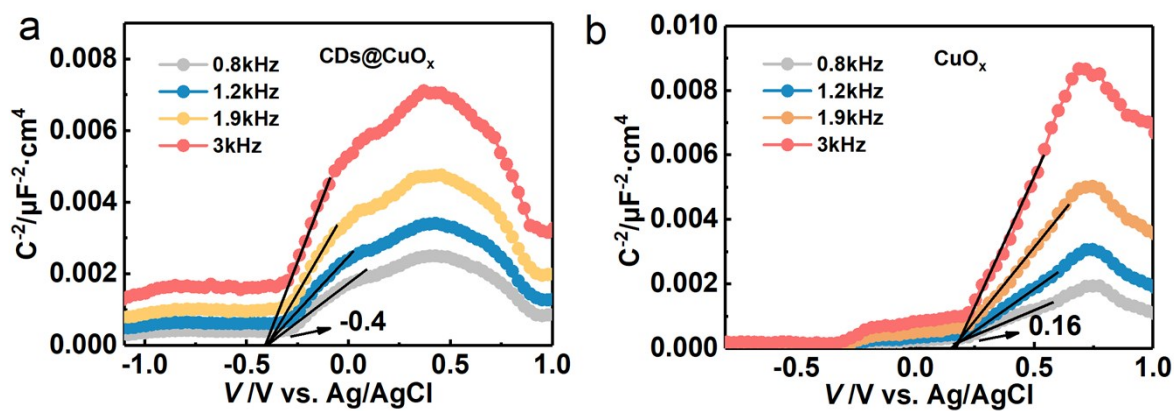

**Figure S12.** The MS curves of (a) CDs@CuO<sub>x</sub> and (b) CuO<sub>x</sub>.

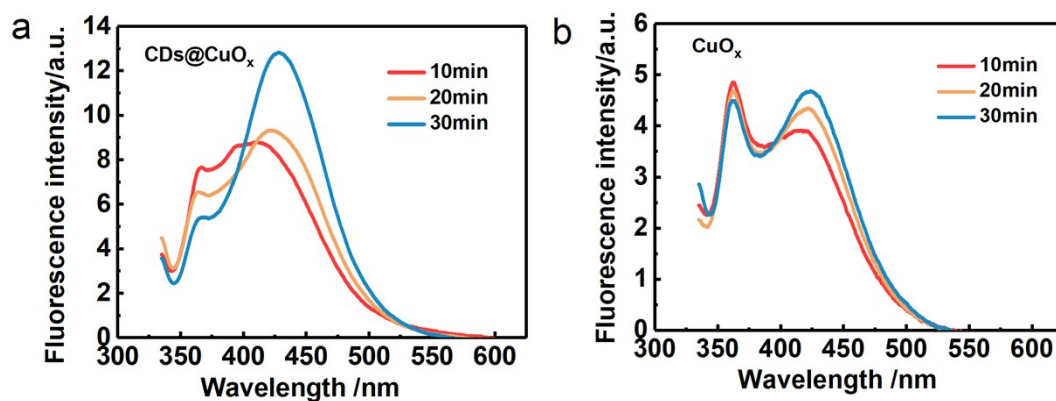

**Figure S13.** The fluorescence intensity of TAOH in the solution with (a) CDs@CuO<sub>x</sub> and (b) CuO<sub>x</sub>, respectively, which is associated with the concentration of ·OH.

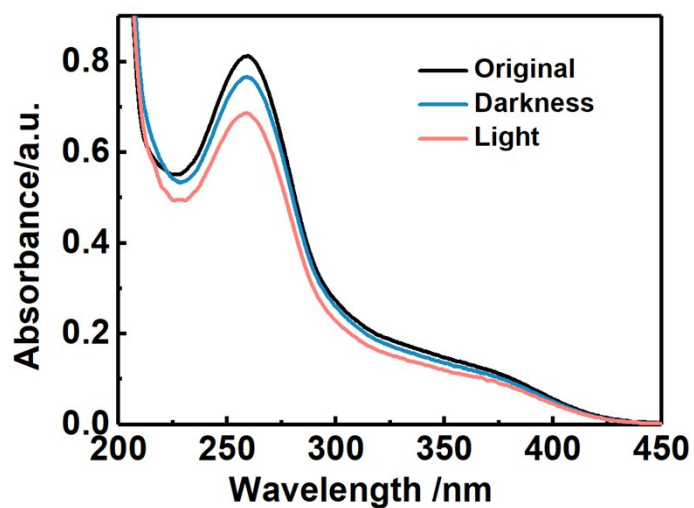

**Figure S14.** The UV-visible absorbance of NBT with the addition of CDs@CuO<sub>x</sub> in darkness and light, respectively.

**Table S1.** The AAS result of the solution with dissolved Cu<sup>2+</sup>.

| Samples                            | Concentration/mg·L <sup>-1</sup> | Absorbance |
|------------------------------------|----------------------------------|------------|
| Cu <sup>2+</sup> -5min             | 3.951                            | 1.0118     |
| Cu <sup>2+</sup> -10min            | 3.955                            | 1.0127     |
| Cu <sup>2+</sup> -15min            | 4.106                            | 1.0519     |
| Reference solution                 | 0                                | 0.00067    |
| Standard Cu <sup>2+</sup> solution | 1.0                              | 0.25672    |
|                                    | 2.0                              | 0.49616    |
|                                    | 3.0                              | 0.69206    |
|                                    | 4.0                              | 1.0810     |

**Table S2.** Comparison of the kinetic parameters of different artificial enzymes for TMB oxidation

| Catalyst                             | $K_m$ /mM   | $V_{max}$ /μM min <sup>-1</sup> | Additive                      | References       |
|--------------------------------------|-------------|---------------------------------|-------------------------------|------------------|
| Fe <sub>3</sub> O <sub>4</sub> @Cu/C | 1.87        | 81.24                           | H <sub>2</sub> O <sub>2</sub> | 10               |
| Cu/Cu <sub>x</sub> O/NC              | 1.61        | 54                              | H <sub>2</sub> O <sub>2</sub> | 11               |
| Cu@Cu <sub>2</sub> O                 | 0.94        | 5.71                            | H <sub>2</sub> O <sub>2</sub> | 12               |
| PtNPs@MnO <sub>2</sub>               | 0.015       | 9.36                            | /                             | 13               |
| CeO <sub>2</sub> +F <sup>-</sup>     | 0.14        | 3.78                            | /                             | 14               |
| CoMo hybrids                         | 0.236       | 3.414                           | /                             | 15               |
| Cu-NC                                | 0.223       | 1.81                            | /                             | 16               |
| CDs                                  | 0.31        | 1.716                           | /                             | 17               |
| Acr+-Mes                             | 0.129       | 0.269                           | /                             | 18               |
| N-PCNSs-3                            | 0.084       | 0.252                           | /                             | 19               |
| <b>CDs@CuO<sub>x</sub></b>           | <b>0.34</b> | <b>5.95</b>                     | <b>/</b>                      | <b>This work</b> |



## References

1. S. Hu, Z. Wei, Q. Chang, A. Trinchì and J. Yang, *Appl. Surf. Sci.*, 2016, **378**, 402-407.
2. Q. Zhang, K. Zhang, D. Xu, G. Yang, H. Huang, F. Nie, C. Liu and S. Yang, *Prog. Mater. Sci.*, 2014, **60**, 208-337.
3. W. Shi, Q. Wang, Y. Long, Z. Cheng, S. Chen, H. Zheng and Y. Huang, *Chem. Commun.*, 2011, **47**, 6695-6697.
4. T.-F. Yeh, C.-Y. Teng, S.-J. Chen and H. Teng, *Adv. Mater.*, 2014, **26**, 3297-3303.
5. S. Navalon, A. Dhakshinamoorthy, M. Alvaro and H. Garcia, *Chemsuschem*, 2013, **6**, 562-577.
6. M. Zhao, J. Zhuang, Q. Cheng, W. Hao and Y. Du, *Small*, 2021, **17**, 1903769.
7. Z. Lin, J. Xiao, L. Li, P. Liu, C. Wang and G. Yang, *Advanced Energy Materials*, 2016, **6**, 1501865.
8. S. Hu, W. Yang, N. Li, H. Wang, J. Yang and Q. Chang, *Small*, 2018, **14**, e1803447.
9. Y. Yang, C. Zhang, D. Huang, G. Zeng, J. Huang, C. Lai, C. Zhou, W. Wang, H. Guo, W. Xue, R. Deng, M. Cheng and W. Xiong, *Applied Catalysis B: Environmental*, 2019, **245**, 87-99.
10. Y.-F. Huang, L. Zhang, L. Ma, Y. Li and C. Zhong, *Catal. Lett.*, 2019, **150**, 815-825.
11. L. Ding, F. Yan, Y. Zhang, L. Liu, X. Yu and H. Liu, *ACS Applied Nano Materials*, 2019, **3**, 617-623.
12. P. Ling, Q. Zhang, T. Cao and F. Gao, *Angew. Chem. Int. Ed. Engl.*, 2018, **57**, 6819-6824.
13. J. Liu, L. Meng, Z. Fei, P. J. Dyson and L. Zhang, *Biosens. Bioelectron.*, 2018, **121**, 159-165.
14. J. Zhang, S. Wu, X. Lu, P. Wu and J. Liu, *Nano Lett.*, 2019, **19**, 3214-3220.

15. Y. Ding, G. Wang, F. Sun and Y. Lin, *ACS Applied Materials & Interfaces*, 2018, **10**, 32567-32578.
16. F. He, Y. Zheng, H. Fan, D. Ma, Q. Chen, T. Wei, W. Wu, D. Wu and X. Hu, *ACS Appl Mater Interfaces*, 2020, **12**, 4833-4842.
17. S. Li, E. Pang, C. Gao, Q. Chang, S. Hu and N. Li, *Chem. Eng. J.*, 2020, **397**, 125471.
18. J. Du, J. Wang, W. Huang, Y. Deng and Y. He, *Anal. Chem.*, 2018, **90**, 9959-9965.
19. K. Fan, J. Xi, L. Fan, P. Wang, C. Zhu, Y. Tang, X. Xu, M. Liang, B. Jiang, X. Yan and L. Gao, *Nat Commun*, 2018, **9**, 1440.
